# Supplementary material for: Role of the prorenin receptor in endometrial cancer cell growth
Source: PubMed Central journal article supplement (PMC8986267; doi:10.18632/oncotarget.28224), 2022-04-01
Supplement: oncotarget-13-28224-s001.pdf [file oncotarget-13-28224-s001.pdf]

## Role of the prorenin receptor in endometrial cancer cell growth

### SUPPLEMENTARY MATERIALS

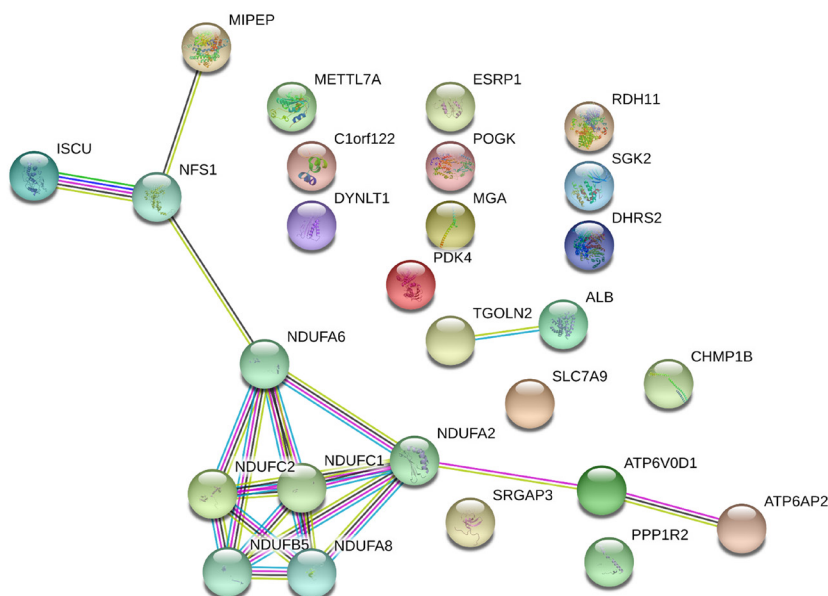

#### Nodes:

##### Network nodes represent proteins

*splice isoforms or post-translational modifications are collapsed, i.e. each node represents all the proteins produced by a single, protein-coding gene locus.*

##### Node Color

-  *colored nodes: query proteins and first shell of interactors*
-  *white nodes: second shell of interactors*

##### Node Content

-  *empty nodes: proteins of unknown 3D structure*
-  *filled nodes: some 3D structure is known or predicted*

#### Edges:

##### Edges represent protein-protein associations

*associations are meant to be specific and meaningful, i.e. proteins jointly contribute to a shared function; this does not necessarily mean they are physically binding each other.*

##### Known Interactions

-  *from curated databases*
-  *experimentally determined*

##### Predicted Interactions

-  *gene neighborhood*
-  *gene fusions*
-  *gene co-occurrence*

##### Others

-  *textmining*
-  *co-expression*
-  *protein homology*

**Supplementary Figure 1: STRING analysis of the proteomic dataset returned following Tandem Mass Tags (TMT) mass spectrometry-based proteomics.** The 22 dysregulated proteins following TMT mass spectrometry following siRNA knockdown were interrogated for putative protein-protein interactions using the online STRING (Search Tool for the Retrieval of Interacting Genes/Proteins) platform (<https://string-db.org/>; accessed 13.07.20). This analysis returned two putative interaction clusters that arise from computational prediction, knowledge transfer between organisms, and/or from interactions aggregated from other primary databases (covering 24,584,628 proteins from 5090 organisms).

**Supplementary Table 1: Total Tandem Mass Tags (TMT)-labelled endometrial cancer proteome, (P)RR siRNA and negative control siRNA treated Ishikawa cells**

| Accession | Description                                                   | t Test      | Log2 Fold change |
|-----------|---------------------------------------------------------------|-------------|------------------|
| Q8IWI9    | MAX gene-associated protein                                   | 0.046267327 | 1.880            |
| Q9P215    | Pogo transposable element with KRAB domain                    | 0.006472898 | 0.710            |
| Q6ZSJ8    | Uncharacterized protein C1orf122                              | 0.031790132 | 0.680            |
| Q9Y6M7-7  | Isoform 7 of Sodium bicarbonate cotransporter 3               | 0.003628848 | -0.620           |
| Q6NXG1    | Epithelial splicing regulatory protein 1                      | 0.044429079 | -0.620           |
| P41236    | Protein phosphatase inhibitor 2                               | 0.004073581 | -0.620           |
| O43493    | Trans-Golgi network integral membrane protein 2               | 0.037525067 | -0.620           |
| Q99797    | Mitochondrial intermediate peptidase                          | 0.029819245 | -0.630           |
| Q7LBR1    | Charged multivesicular body protein 1b                        | 0.014874532 | -0.650           |
| O95298    | NADH dehydrogenase [ubiquinone] 1 subunit C2                  | 0.018008751 | -0.680           |
| Q9H1K1    | Iron-sulfur cluster assembly enzyme ISCU, mitochondrial       | 0.004685317 | -0.690           |
| Q93050-1  | Isoform 2 of V-type proton ATPase 116 kDa subunit a isoform 1 | 0.001091984 | -0.700           |
| Q9UPY5    | Cystine/glutamate transporter                                 | 0.001693745 | -0.700           |
| O43677    | NADH dehydrogenase [ubiquinone] 1 subunit C1, mitochondrial   | 0.011606073 | -0.700           |
| Q8TC12    | Retinol dehydrogenase 11                                      | 0.007382326 | -0.710           |
| P61421    | V-type proton ATPase subunit d 1                              | 0.004917348 | -0.710           |
| Q13268    | Dehydrogenase/reductase SDR family member 2, mitochondrial    | 0.007202643 | -0.720           |
| P02768    | Serum albumin                                                 | 0.031589381 | -0.720           |
| Q9H8H3    | Methyltransferase-like protein 7A                             | 0.000120546 | -0.750           |
| P63172    | Dynein light chain Tctex-type 1                               | 2.07236E-05 | -0.850           |
| O43295    | SLIT-ROBO Rho GTPase-activating protein 3                     | 0.037883627 | -0.910           |
| O75787    | Renin receptor                                                | 0.001951605 | -1.480           |

This table contains the complete proteomic profile achieved using TMT-based mass spectrometry along with the appropriate protein FDR confidence value, unique UniProt Human accession number, number of unique peptides, raw fold change value and log2 transformed fold change value, and the scaled abundances score for each peptide. A legend of essential parameters is also included with the document.

**Supplementary Table 2: The complete list of dysregulated proteins following siRNA knockdown and Tandem Mass Tags (TMT) mass spectrometry-based proteomics. See Supplementary Table 2**

**Supplementary Table 3: Protein Atlas Summary Table. See Supplementary Table 3**

**Supplementary Table 4: Quantitative real time PCR primers summary**

| Gene    | GeneBank Accession No. | Primer Sequence (5'-3')           | Concentration | Annealing temperature |
|---------|------------------------|-----------------------------------|---------------|-----------------------|
| ATP6AP2 | NM_005765              | F: ACAATGAAGTTGACCTGCTCTTTCTTTCTG | 100 nM        | 76°C                  |
|         |                        | R: CCTTGGCTAGATGCTTATGACGAGACA    |               |                       |
| RNA18S1 | M10098.1               | F: GTAACCCGTTGAACCCCAAT           | 100 nM        | 81°C                  |
|         |                        | R: CCATCCAATCGGTAGTAGCG           |               |                       |
| ACTB    | NM_001101              | F: CGCGAGAAGATGACCCAGAT           | 100 nM        | 83°C                  |
|         |                        | R: GAGTCCATCACGATGCCAGT           |               |                       |
| YWHAZ   | NM_001135699           | F: CCTGCATGAAGTCTGTAACCTGAG       | 100 nM        | 76°C                  |
|         |                        | R: GACCTACGGCTCCTACAACA           |               |                       |

This table contains the GeneBank accession number, primer sequence, concentration and annealing temperature for each primer set utilized in this study. Each sample was run in duplicate with the appropriate controls (-RT; dH2O). Messenger RNA abundance ( $2^{-\Delta\Delta CT}$ ) was calculated relative to the genomic mean of the following housekeeping genes;  $\beta$ -actin (ACTB), RNA, 18S ribosomal 1 (RNA18S1) and Tyrosine 3-Monooxygenase/Tryptophan 5-Monooxygenase Activation Protein Zeta (YWHAZ), and compared with a calibrator sample (term human placenta) which was included into each run.
